# Supplementary material
Source: bioRxiv or medRxiv preprint supplement (https://www.biorxiv.org/highwire/filestream/130491/field_highwire_adjunct_files/1/434654-10.pdf)
Supplement: Supplementary file [file 434654-10.pdf]

1 **Table S9.** Statistics of the “Microbial data only” model (i.e.  $\log(R_H)$ ) as a function of TMB,  
 2  $\log(\text{AMB})$ ,  $\log(\text{Fungi: Bacteria})$ , and  $\log(\text{Gram-positive: Gram-negative})$ .  $P=0.005$ ,  
 3  $\text{BIC}=115.0$ . Significance codes:  $0.001 < P < 0.01$  ‘\*\*\*’,  $0.01 < P < 0.05$  ‘\*’,  $0.05 < P < 0.1$  ‘†’.

|                        | <b>Estimate</b> | <b>Std. Error</b> | <b>t-value</b> | <b>P</b> |
|------------------------|-----------------|-------------------|----------------|----------|
| 4 (Intercept)          | 1.66010         | 0.71842           | 2.311          | 0.025*   |
| 5 TMB                  | - 2.32455       | 0.81341           | - 2.858        | 0.006**  |
| 6 $\log(\text{AMB})$   | 0.18855         | 0.07296           | 2.584          | 0.012*   |
| $\log(\text{F:B})$     | - 0.01802       | 0.11301           | - 0.159        | 0.873    |
| 7 $\log(\text{G+:G-})$ | - 0.55504       | 0.30761           | - 1.804        | 0.077 †  |
